# Supplementary material for: Dynamic allosteric networks drive adenosine A1 receptor activation and G-protein coupling
Source: eLife. 2023 Sep 1;12:RP90773. doi: 10.7554/eLife.90773 (PMC10473838; doi:10.7554/eLife.90773)
Supplement: Supplementary file 1. [file elife-90773-supp1.xlsx]

## Sheet: Sheet1
		Pocket	Location	Inactive (containing PEN residues)	Intermediate (containing PEN residues)	Pre-Active (containing PEN residues)	Fully-Active (PEN residues includes)
		PA	ECL2 vestivule	ECL2 (K173* and I167)	ECL2 (K173*)	ECL2 (K173*)	ECL2 (K173*, I167 and W156*)
		PB	Othosteric site + Secondary pocket	ECL2 (E172, S176, I175, E170*, K168, C169, V174), TM2 (G72, N70)	ECL2 (E172, V174, I175), TM7 (Y271, T277, I274, T270, H278)	ECL2 (E172, I175, E170*, K168, C169, V174), TM2 (G72, I63), TM7 (T270,Y271, A273, T277, H278)	ECL2 (E172, I175, E170*, K168, C169, V174), TM2 (N70, G72), TM7 (T270, Y271, A273, T277, H278)
				TM6 (N254), ECL3 (K265*)	ECL3 (K265*, P266)	TM6 (W247, H251) ECL3 (K265*, P266)	TM6 (W247, L250, N254) ECL3 (K265*, P266)
		PC	Extrahelical TM1-TM7 upper region	TM1 (E16)	TM1 (E16), TM7 (Y271, I272)	TM1 (E16, Y12, N9), TM7 (Y271, I272)	TM1 (E16, Y12, N9), TM7 (Y271, I272)
		PD	Extrahelical TM1-TM6-TM7 upper region	TM1 (I19)	TM1 (I19), TM6 (L245*)	TM6 (L242*, S246*), TM7 (A282, M283)	TM6 (L242*), TM7 (G279*, M283)
		PE	Sodium ion site at the Internal channel	TM2 (D55)	None	TM2 (D55), TM6 (W247), TM3 (S94), TM7 (N284)	TM2 (D55), TM6 (W247), TM3 (S94), TM7 (N284, N280)
		PF	Extrahelical TM2-TM3-TM4 lower region	TM4 (A124, I128), TM3 (D104), TM2 (F47, S50)	TM4 (A124), TM3 (D104), TM2 (F47, S50)	TM4 (A124, I128, C131), TM3 (D104)	TM3 (S93)
		PG	Extrahelical TM3-TM5 lower region	None	TM5 (E202), TM3 (D104 and K110)	TM5 (E202, L195), TM3 (D104 and K110)	TM5 (E202), TM3 (K110)
		PH	Extrahelical TM5-TM6 lower region	TM6 (A237, L236, L230, E229)	TM6 (A244, F243,L240, A237, L236, L230, E229)	TM6 (A327, L236, E229) TM3 (L201,Y200)	TM6 (L240, A327, L236, I232, E229)
		PI	Extrahelical TM6-TM7 lower region	None	None	TM6 (L238, L242*) TM7 (R291, M283, N284, I286)	TM6 (L238, I239,L242*) TM7 (R291, N284, M283, Y288)
		PJ	Extrahelical TM1-TM7-H8 lower region	TM1 (N27, L29, V30)	TM1 (N27, L29, V30), H8 (F229, R296)	TM7 (I286)	TM7 (F290, I286), H8 (R296)
		PK	Extrahelical TM1-H8-C-ter lower region	None	TM1 (W32 and A33), H8 (K301, V297,T298, N293, K294)	TM1 (N37, V36 and W32), H8 (E317, D316, N293 and K294)	None
		PL	Intrahelical lower region	TM3 (R108, R105), TM6 (S235, K228), TM2 (D42), H8 (K294, D326)	TM3 (R108, R105, I101, D104, V109), H8 (N293, K294), TM6 (S235, l236, I239), TM2 (I48, D42)	TM3 (R108, D104, V109), H8 (N293, K294), TM6 (I232), TM7 (I292), TM2 (D42, R41), TM4 (K116)	TM3 (R108, V109), H8 (N293), TM6 (I232), TM7 (I292), TM2 (D42), TM5 (R208)
		PM	Extrahelical TM1-TM2-TM4 lower region	TM2 (C46, V49, S50, D42), TM4 (A124, I128), TM1 (I31, V34)	TM2 (S50, V49, D42, C46), TM4 (A124, A125), TM1 (I31, V34)	TM2 (D42), TM4 (A124, I128)	TM2 (D42)
		PN	Extrahelical TM5-TM6 lower region	None	None	TM6 (E229, K228)	TM6 (E229), TM5 (R208)
